# Supplementary material
Source: Copernicus journal article supplement (doi:10.5194/acp-26-5925-2026)
Supplement: Supplementary file 1 [file acp-26-5925-2026-supplement.pdf]

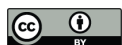

*Supplement of*

## **Dissimilar roles of aerosols, nitrogen deposition and ozone on the terrestrial carbon sink in China during 2010–2020**

**Nanhong Xie et al.**

*Correspondence to:* Tijian Wang ([tjwang@nju.edu.cn](mailto:tjwang@nju.edu.cn))

The copyright of individual parts of the supplement might differ from the article licence.

42  
43  
44  
45  
46  
47  
48  
49  
50  
51

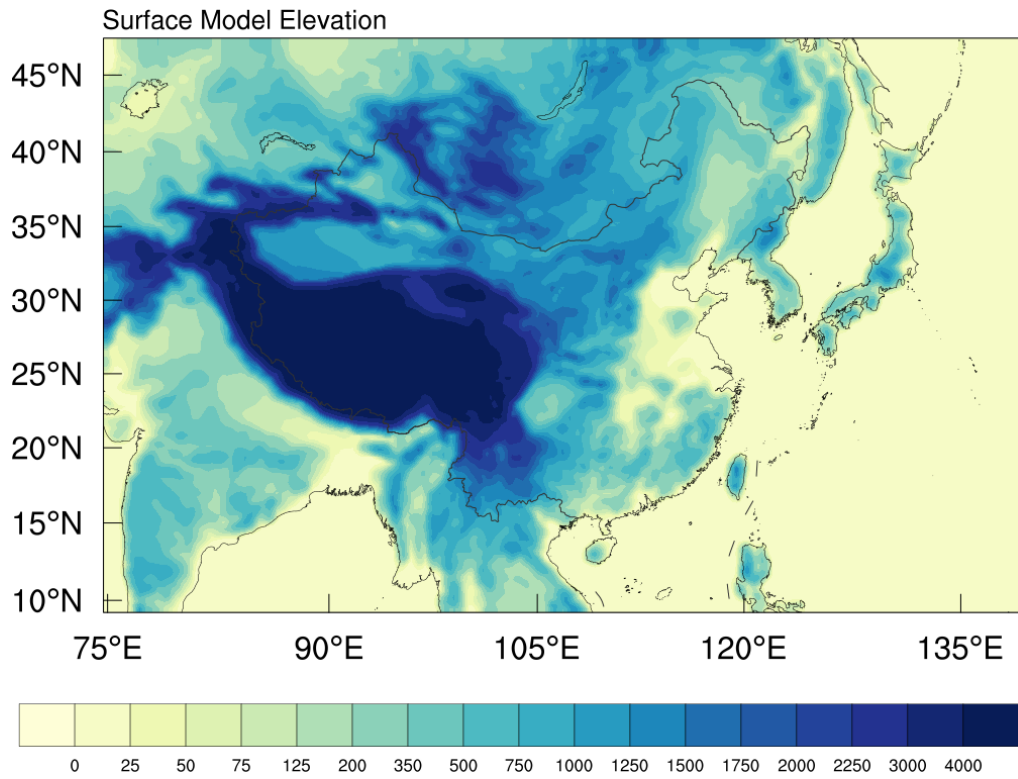

52

53 **Figure S1.** The modeling domain applied and Topographic Elevation (Units: m) in this study.

54  
55  
56  
57  
58  
59  
60  
61  
62  
63  
64  
65  
66  
67  
68  
69

70  
71  
72  
73  
74  
75  
76

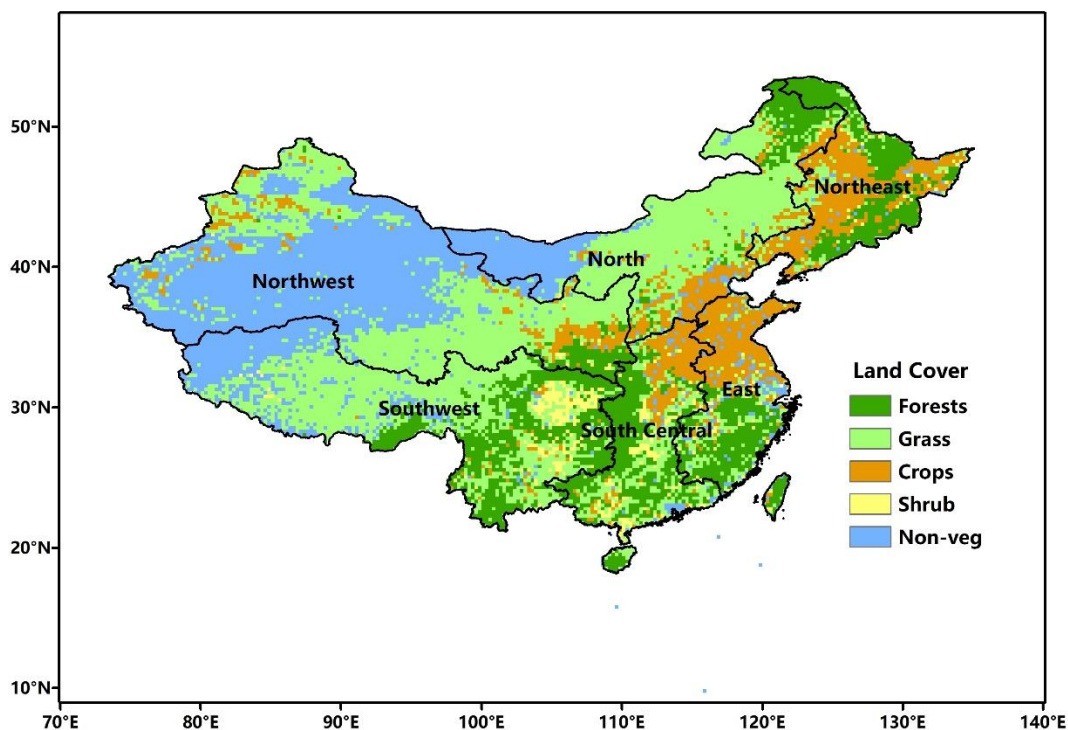

77

78 **Figure S2.** Regional division of China used in this study, including six subregions: Northeast  
79 (Heilongjiang, Jilin, and Liaoning), North (Beijing, Tianjin, Hebei, Shanxi, and Inner Mongolia),  
80 Northwest (Xinjiang, Gansu, Ningxia, Qinghai, and Shaanxi), East (Shandong, Jiangsu, Anhui,  
81 Shanghai, Zhejiang, Fujian, and Jiangxi), South Central (Henan, Hubei, Hunan, Guangxi,  
82 Guangdong, and Hainan), and Southwest (Xizang, Sichuan, Yunnan, Chongqing, and Guizhou).  
83 The background map shows ecosystem types further categorized based on 2017 MODIS land use  
84 types.

85  
86  
87  
88  
89  
90  
91  
92  
93  
94  
95  
96  
97  
98

99  
100  
101  
102  
103  
104  
105  
106  
107  
108  
109  
110  
111

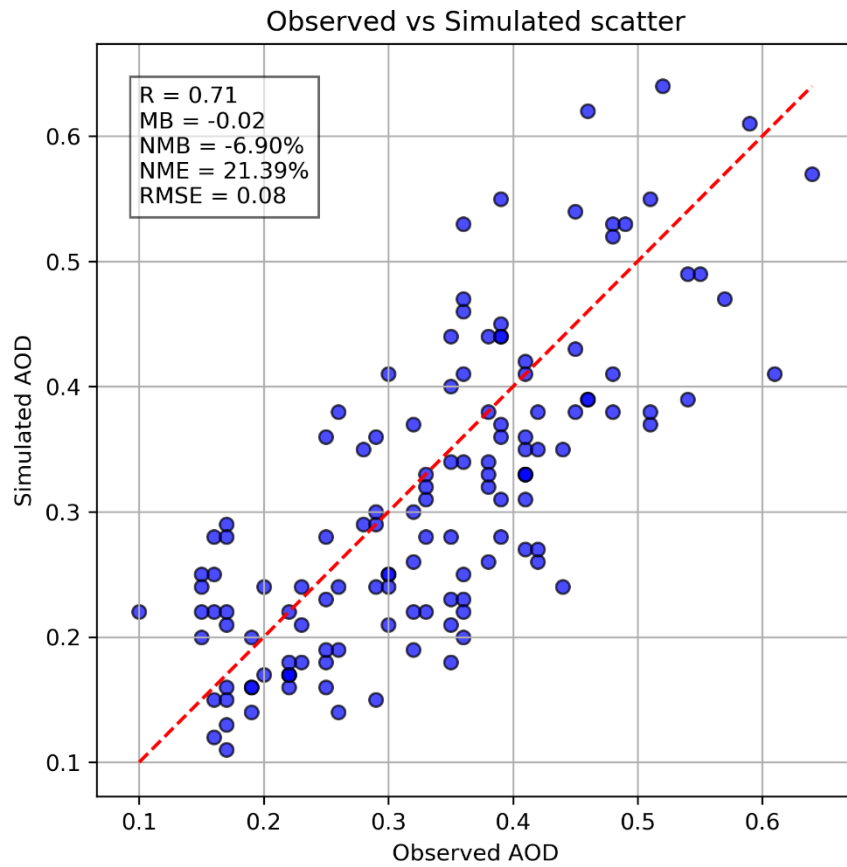

112

113 **Figure S3.** Monthly mean aerosol scatter plot between simulations and MODIS from 2010 to  
114 2020.

115  
116  
117  
118  
119  
120  
121  
122  
123

124  
125  
126  
127  
128  
129  
130  
131  
132  
133  
134  
135  
136  
137  
138  
139

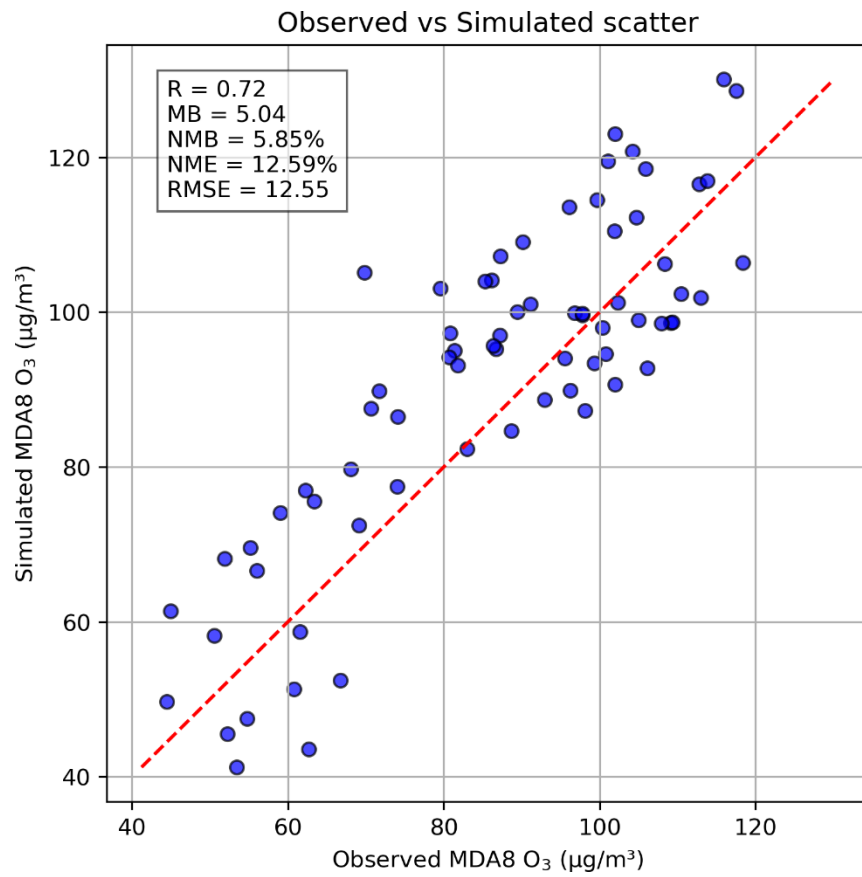

140

141 **Figure S4.** Scatter plot of MDA8 O<sub>3</sub> from simulations and observations from 2015 to 2020.

142  
143  
144  
145  
146  
147  
148

149  
150  
151  
152  
153  
154  
155  
156  
157  
158  
159  
160

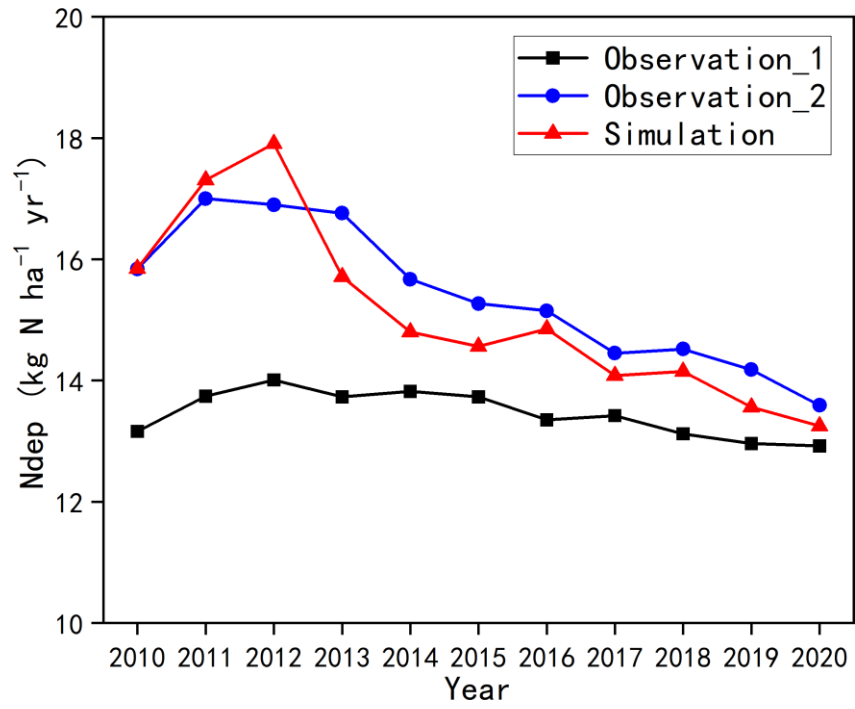

161  
162  
163  
164  
165  
166  
167  
168  
169  
170  
171  
172  
173  
174  
175  
176

**Figure S5.** Comparison of annual mean atmospheric nitrogen deposition from simulations and literature reports during 2010–2020.

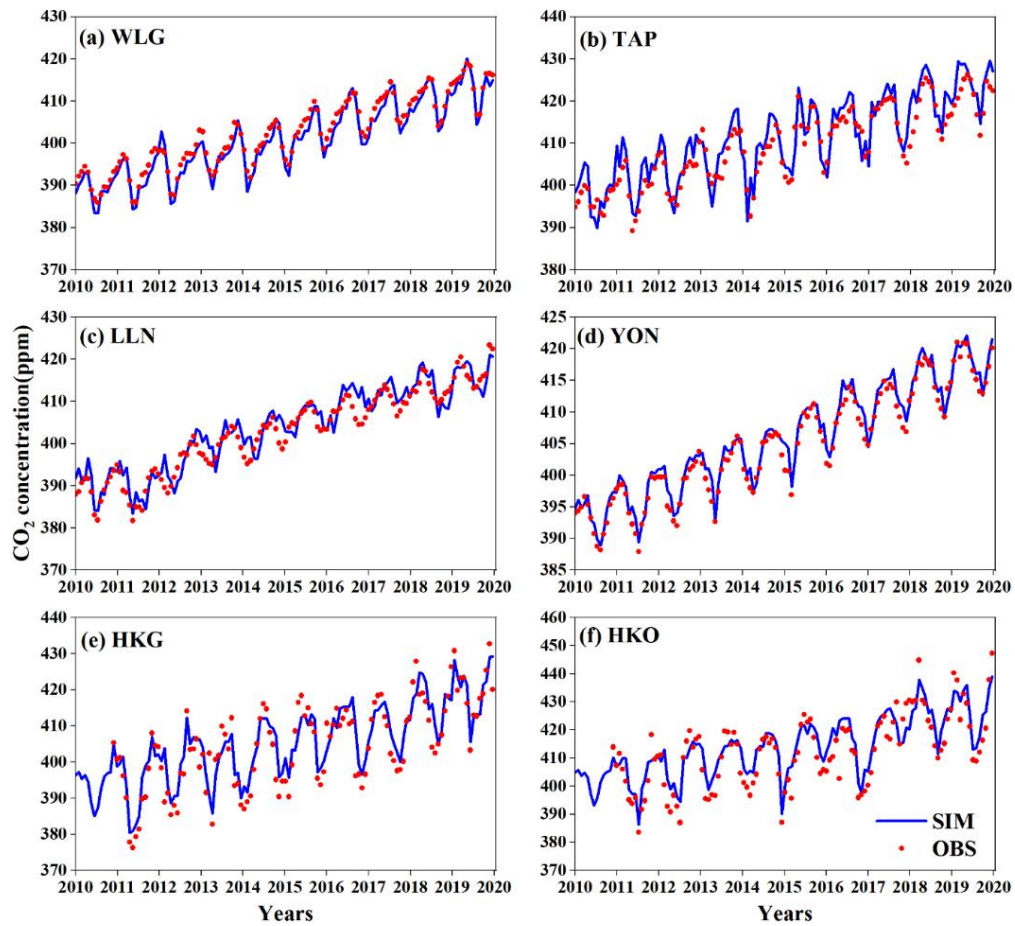

177

178 **Figure S6.** Monthly mean CO<sub>2</sub> concentration data at six monitoring sites in East Asia, with  
 179 simulated values (blue line) and observed values (red dots). Units: ppm.

180  
 181  
 182  
 183  
 184  
 185  
 186  
 187  
 188  
 189  
 190  
 191  
 192  
 193  
 194  
 195  
 196  
 197  
 198  
 199  
 200

201

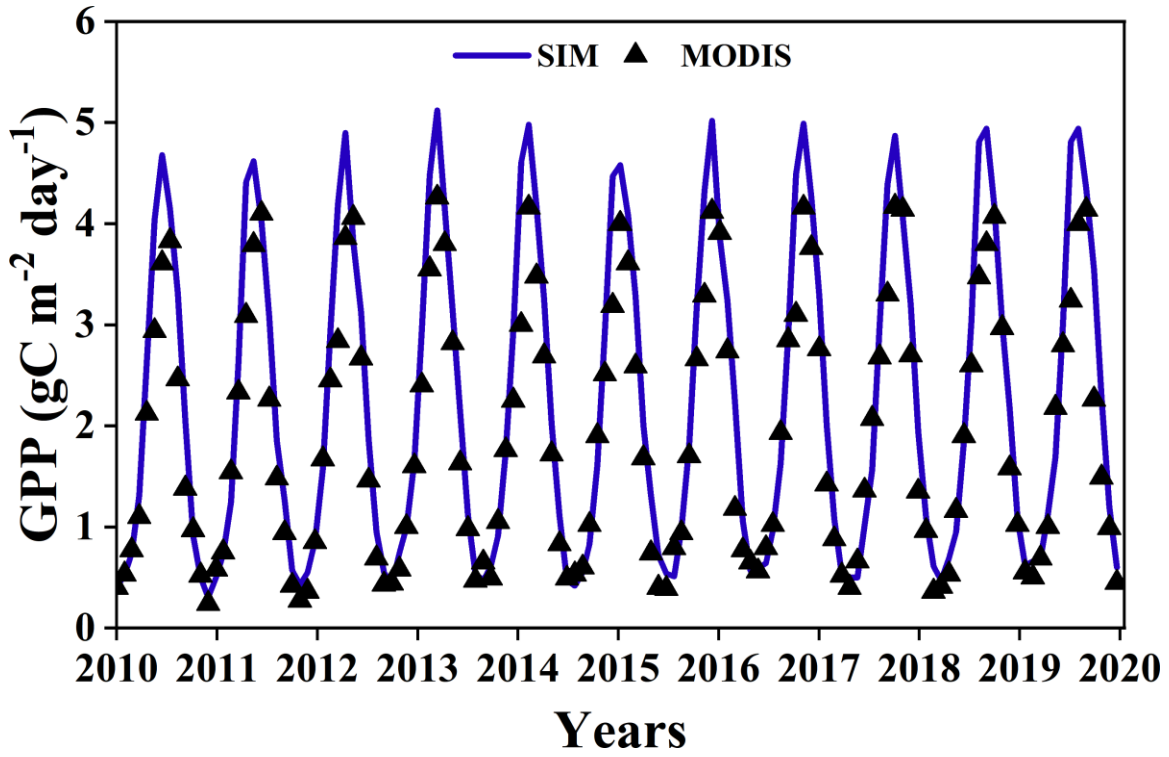

202

203 **Figure S7.** Comparison of the monthly mean GPP values simulated for the period 2010–2020  
204 (blue line) with MODIS data (black triangles). Units: gC m<sup>-2</sup> day<sup>-1</sup>

205  
206  
207  
208  
209  
210  
211  
212  
213  
214  
215  
216  
217  
218  
219  
220  
221  
222  
223  
224  
225  
226  
227  
228  
229

230  
231

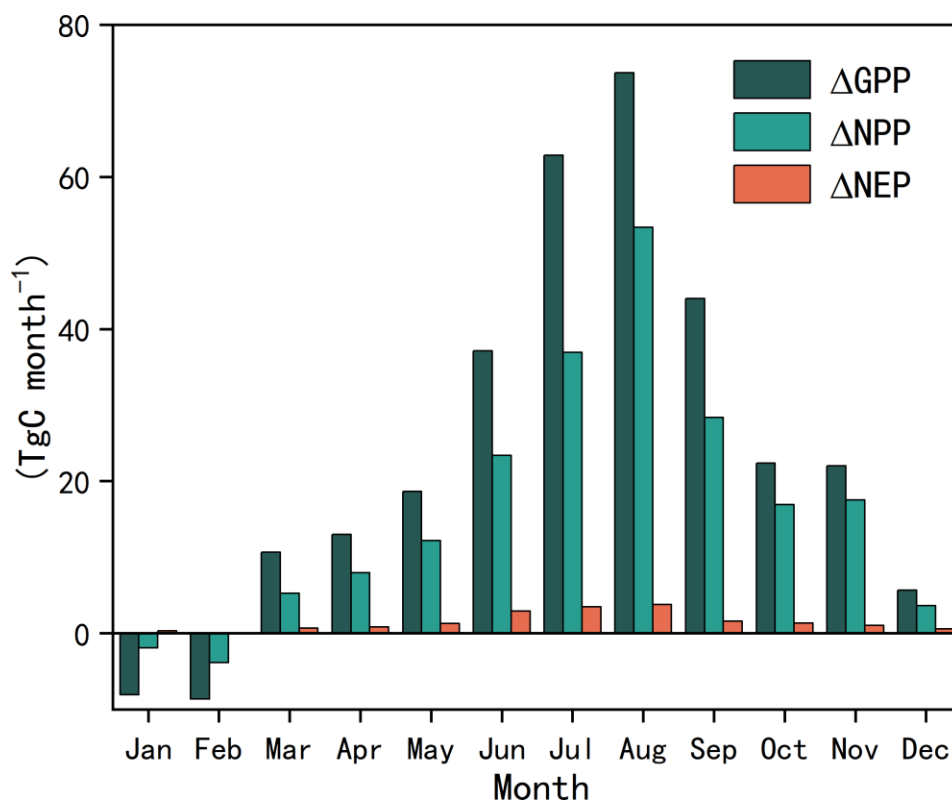

232

233 **Figure S8.** Monthly variations in GPP, NPP, and NEP induced by aerosol direct radiative effects  
234 during 2010–2020.

235  
236  
237  
238  
239  
240  
241  
242  
243  
244  
245

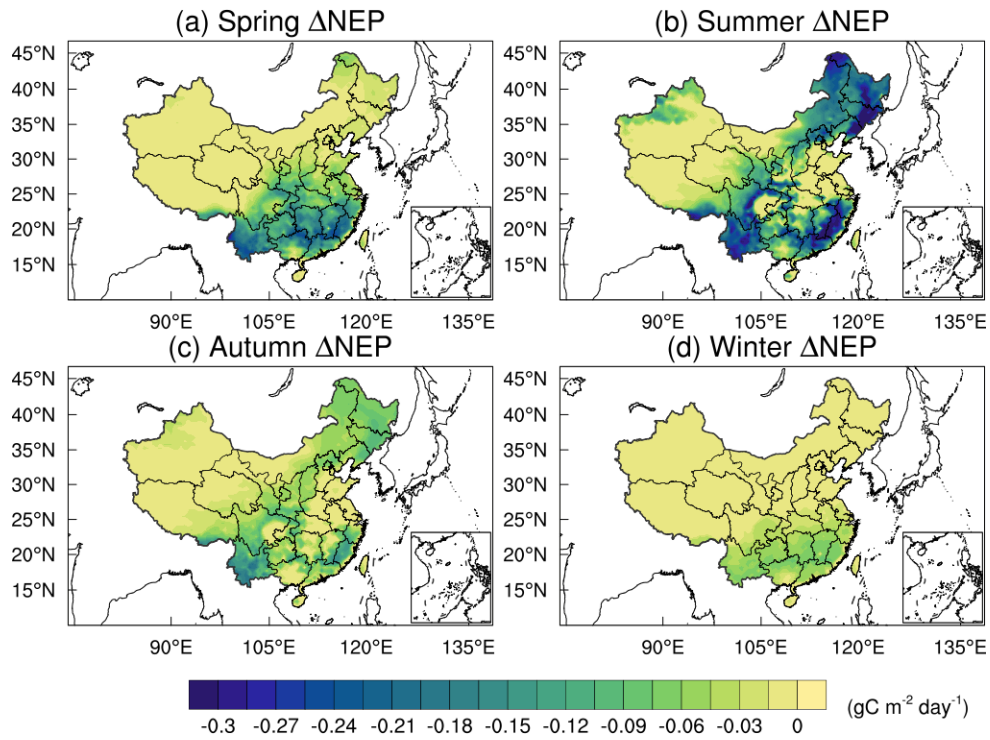

246

247 **Figure S9.** O<sub>3</sub>-induced seasonal variation in NEP.

248

249

250

251

252

253

254

255

256

257

258

259

260

261

262

263

264

265

266

267

268

269

270

271

272

273

274

275  
276

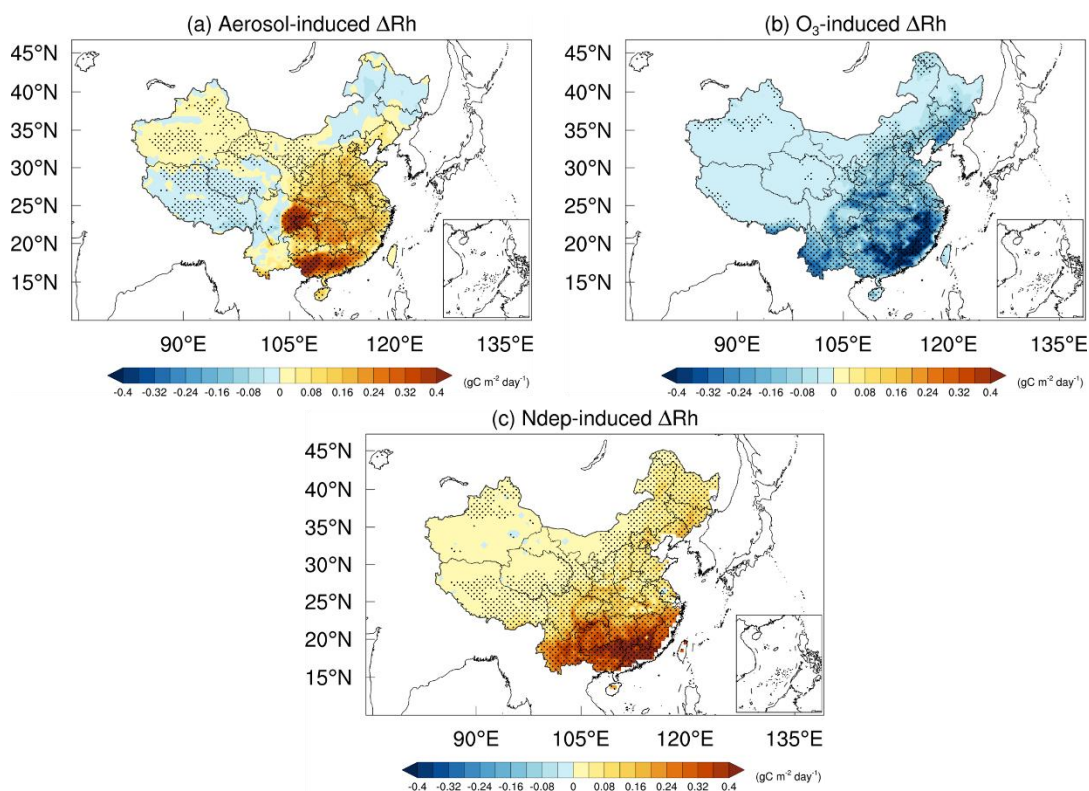

277

278 **Figure S10.** Spatial responses of heterotrophic respiration (Rh) to (a) aerosols, (b) O<sub>3</sub> pollution,  
279 and (c) atmospheric nitrogen deposition over China during 2010–2020. Black dots denote  
280 significant changes ( $p < 0.01$ ).

281

282

283

284

285

286

287

288

289

290

291

292

293

294  
295  
296  
297

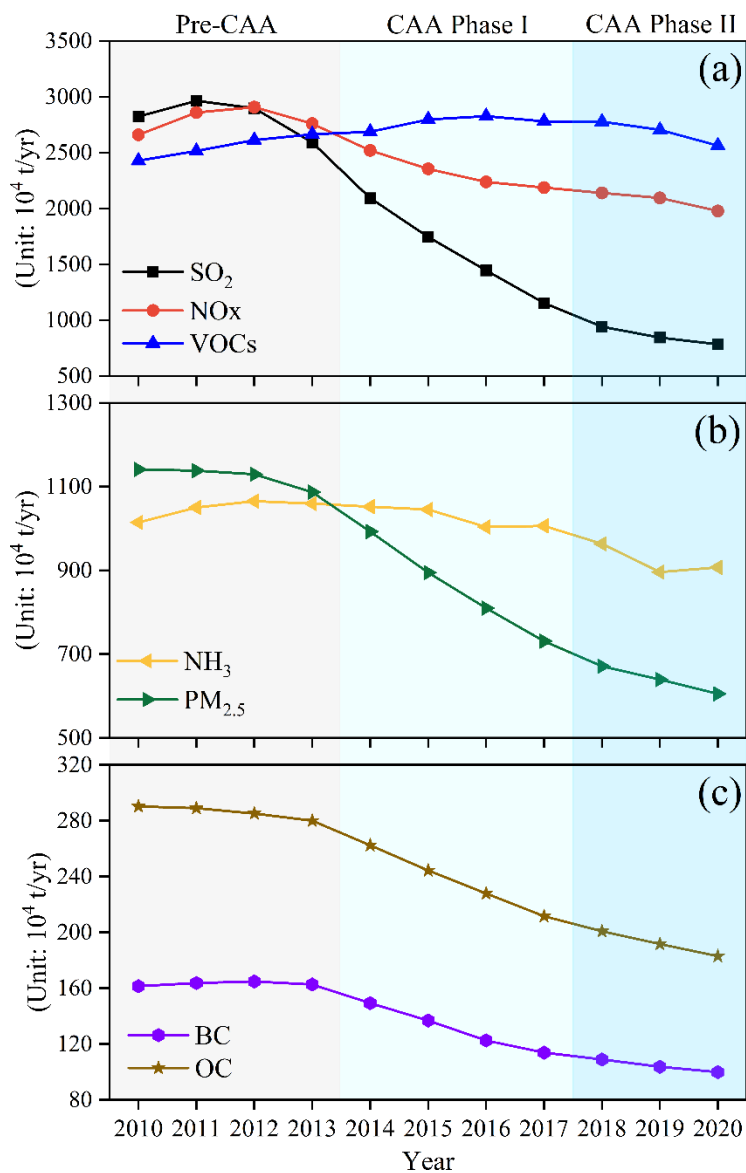

298  
299 **Figure S11.** Temporal evolution of major anthropogenic emissions in China during 2010–2020.  
300 Panels show grouped annual emissions of (a) SO<sub>2</sub>, NO<sub>x</sub>, and VOCs, (b) NH<sub>3</sub> and PM<sub>2.5</sub>, and (c)  
301 BC and OC. Shaded backgrounds indicate Pre-CAA (2010–2013), CAA Phase I (2014–2017),  
302 and CAA Phase II (2018–2020).  
303  
304

305  
 306  
 307  
 308  
 309  
 310

311 **Table S1.** Information about the CO2 observation site and comparison between simulation and  
 312 observation.

| Sites | Time          | (Latitude,<br>Longitude) | Elevation<br>(m) | Obs<br>(ppm) | Sim<br>(ppm) | MB<br>(ppm) | RMSE<br>(ppm) | R    |
|-------|---------------|--------------------------|------------------|--------------|--------------|-------------|---------------|------|
| WLG   | 2010-<br>2020 | (36.29,<br>100.90)       | 3810             | 403.3        | 401.5        | -1.8        | 2.98          | 0.92 |
| TAP   | 2010-<br>2020 | (36.73,<br>126.13)       | 20               | 410.3        | 412.9        | 2.6         | 4.6           | 0.89 |
| LLN   | 2010-<br>2020 | (23.46,<br>120.87)       | 2867             | 403.5        | 406.3        | 2.8         | 4.01          | 0.88 |
| YON   | 2010-<br>2020 | (24.47,<br>123.01)       | 30               | 405.9        | 404.8        | -1.1        | 1.75          | 0.96 |
| HKG   | 2011-<br>2020 | (22.21,<br>114.25)       | 60               | 404.7        | 407.8        | 3.1         | 6.02          | 0.84 |
| HKO   | 2011-<br>2020 | (22.31,<br>114.17)       | 65               | 412.3        | 415.6        | 3.3         | 6.17          | 0.83 |

313  
 314
